# Supplementary material for: Allele-specific antibodies to Plasmodium vivax merozoite surface protein-1: prevalence and inverse relationship to haemoglobin levels during infection
Source: PubMed Central journal article supplement (PMC5112628; doi:10.1186/s12936-016-1612-z), 2016-11-16
Supplement: 12936_2016_1612_MOESM1_ESM.pdf [file 12936_2016_1612_MOESM1_ESM.pdf]

Alignment of sequences of the block 10 of PvMSP-1 found in parasites infecting 41 patients. Five sequences (I, II, III, VI and VIII corresponding to 73% of all sequences) are identical to the sequences of recombinant antigens used in serology (BR07, BP13, BP29, BP01, BP39, respectively). Sequences IV and V are quite similar to BP29 antigen (74.0% and 67.1% of amino acid similarity, respectively), whereas VII sequence has 63.7% of identity with BP01 antigen.

|             | 10                  | 20                 | 30                                 | 40                                    | 50            | 60             | 70          | 80             | 90 |
|-------------|---------------------|--------------------|------------------------------------|---------------------------------------|---------------|----------------|-------------|----------------|----|
| <b>I</b>    | ST SVA              | VTVP GAVVPG        | VP TAAAAGS GASGAVP                 | PAT GPGAAA                            | GS TEENVAAK   |                |             |                |    |
| <b>II</b>   | ST SVA              | VTVP GAVVPG        | VP TAAAAGS GASGAVPPA GSV           | PAT GPGAAA                            | GS TEENVAAK   |                |             |                |    |
| <b>III</b>  | ST SVA              | VTVP GAVVPG        | VP TAAAAGS GASGAVPPAAAAGS GAS GAVP | PAGGPSPPAT GG VVP G                   | VVESAEAQ TKAQ |                |             |                |    |
| <b>IV</b>   | ST SVA              | VTVP GAVVPG        | VP TAAAAGS GASGAVPPA GGPSPPAT      | GG VVP G                              | VVESAEAQ TQTQ |                |             |                |    |
| <b>V</b>    | ST SVA              | VTVP GAVVPG        | VP TAAAAGS GASGAVPPA GGPSPPAT      | GG VVP GG VVP GG VVP GG VVESAEAQ TQTQ |               |                |             |                |    |
| <b>VI</b>   | GA SAPAAAA          | VTVP GA GVPAAA AVT | VP GA GVPAA                        | GV VPGA                               | PA            | GAA            | PAGA APAGAA | PS APGAQEQTQTQ |    |
| <b>VII</b>  | GA SAPAAAA          | VTVP GA GVPAA GAGV | VP GAAAAG VVPGA SAAG VVPGA         | PA                                    | GAA           | PS APGAQEQTQTQ |             |                |    |
| <b>VIII</b> | GA ST TAA TLPVTVPSA | VPG GLPGAGVP GAAA  | GL TPP                             | PPA GSV                               | PAT GPGAAA    | GS TEENVAAK    |             |                |    |
